# Supplementary material
Source: MDPI journal article supplement (https://www.mdpi.com/2073-4441/10/2/104)
Supplement: s1 [file s1]

Supporting Information

Occurrence, Distribution, and Risk Assessment of Antibiotics in a Subtropical River-Reservoir System

Yihan Chen 1, Hongjie Chen 2,3, Li Zhang 1, Yue Jiang 1, Karina Yew-Hoong Gin 2,3 and
Yiliang He 1,4,*

1 School of Environmental Science & Engineering, Shanghai Jiao Tong University, 800 Dongchuan Road, Shanghai 200240, China; chenyhok1987@sjtu.edu.cn (Y.C.); zhangli8157@sina.com (L.Z.); jiangyue0524@sjtu.edu.cn (Y.J.)

2 Department of Civil and Environmental Engineering, National University of Singapore, 1 Engineering Drive 2, E1A 07-03, Singapore 117576, Singapore; e0008539@u.nus.edu (H.C.); ceeginyh@nus.edu.sg (K.Y.-H.G.)

3 NUS Environmental Research Institute, National University of Singapore, 5A Engineering Drive 1, #02-01, Singapore 117411, Singapore

4 China-UK Low Carbon College, Shanghai Jiao Tong University, 800 Dongchuan Road, Shanghai 200240, China

1. Hydrological data

Data on the monthly rainfall from April 2015 to March 2016 in the HRDR was acquired from the China meteorological information service system (http://data.cma.cn/). In addition, basic data on the monthly hydrological information of FSBR from April 2015 to March 2016 was obtained from the Dongjiang river basin hydrological information service system (http://www.djriver.cn/) (Table S1). Taken together, three hydrological periods according to rainfall and inflowing runoff (Figure.S1): wet season, May, January and March; dry season, April, October, November and February; wet-to-dry transition season, June to September and December.

**Table S1.** Description of the basic hydrological information of Fengshuba Reservoir. Hydraulic retention times were calculated as volume of reservoir divided reservoir outflow.

|  | **Reservoir inflow**  **(m3/s)** | **Reservoir outflow**  **(m3/s)** | **Volume of reservoir**  **(billion m3)** | **Hydraulic retention time (days)** |
| --- | --- | --- | --- | --- |
| April 2015 | 45.6 | 53.6 | 0.48 | 104 |
| May 2015 | 280 | 64.4 | 0.71 | 128 |
| June 2015 | 186 | 157 | 1.13 | 83 |
| **July 2015** | **164** | **110** | **1.16** | **122** |
| August 2015 | 134 | 137 | 1.27 | 107 |
| September 2015 | 143 | 116 | 1.30 | 130 |
| October 2015 | 86.0 | 85.0 | 1.33 | 181 |
| **November 2015** | **62.6** | **62.7** | **1.33** | **246** |
| December 2015 | 126 | 71.6 | 1.40 | 226 |
| January 2016 | 233 | 243 | 1.39 | 66 |
| February 2016 | 162 | 298 | 1.31 | 51 |
| **March 2016** | **375** | **264** | **1.11** | **49** |





**Figure S1.** Monthly variations of rainfall and inflowing runoff for the HRDR from April 2015 to March 2016.

**Table S2.** The basic physicochemical characteristics of the target antibiotics.

|  | **CAS** | **Molecular formula** | **MW** | **water solubility (mg/L) at 25°C** | **Log Kow** |
| --- | --- | --- | --- | --- | --- |
| sulfadiazine | 68-35-9 | C10H10N4O2S | 250.277 | 28100 | -0.09 |
| sulfamonomethoxine | 1220-83-3 | C11H12N4O3S | 280.303 | 4029 | 0.7 |
| sulfaquinoxaline | 59-40-5 | C14H12N4O2S | 300.336 | 449.2 | 1.68 |
| norfloxacin | 70458-96-7 | C16H18FN3O3 | 319.331 | 178000 | -1.03 |
| ciprofloxacin | 85721-33-1 | C17H18FN3O3 | 331.341 | 11500 | 0.28 |
| ofloxacin | 82419-36-1 | C18H20FN3O4 | 361.367 | 676000 | -2 |
| amoxicillin | 61336-70-7 | C16H19N3O5S | 365.404 | 3433 | 0.87 |
| cefalexin | 23325-78-2 | C16H17N3O4S | 347.389 | 1789 | 0.65 |
| penicillin G | 113-98-4 | C16H18N2O4S | 334.39 | 210 | 1.83 |
| penicillin V | 132-98-9 | C16H18N2O5S | 350.389 | 101.1 | 2.09 |
| oxytetracycline | 2058-46-0 | C22H24N2O9 | 460.434 | 1400 | -0.9 |
| tetracycline | 64-75-5 | C22H24N2O8 | 444.435 | 3880 | -1.3 |
| doxycycline | 24390-14-5 | C22H26N2O9 | 462.45 | 313 | -0.02 |
| tylosin | 1401-69-0 | C46H77NO17 | 916.1 | 1000 | 3.87 |
| erythromycin-H2O | 23893-13-2 | C37H65NO12 | 715.927 | 2000 | NF |
| lincomycin | 154-21-2 | C18H34N2O6S | 406.537 | 927.3 | 0.56 |
| vancomycin | 197638-25-8 | C66H75Cl2N9O24 | 1449.25 | 100000 | NF |

NF: Not found.

**Table S3.** Usage of selected antibiotics in China in 2013 [1].

|  | | | **usage (tons)** | | | |
| --- | --- | --- | --- | --- | --- | --- |
|  | human | pig | | chicken | others | total |
| SDZ | 238 | 648 | | 221 | 148 | 1260 |
| SMM | 9.93 | 1400 | | 477 | 320 | 2210 |
| SQX | a | 0 | | 1250 | 190 | 1440 |
| NOR | 1013 | 2820 | | 961 | 644 | 5440 |
| CIP | 455 | 3110 | | 1060 | 712 | 5340 |
| OFC | 1286 | 2440 | | 832 | 557 | 5110 |
| AMX | 2129 | 6860 | | 2340 | 1570 | 12900 |
| CLX | 2542 | 83.4 | | 28.3 | 19.2 | 2670 |
| PEN | 917 | 3700 | | 1260 | 846 | 6730 |
| OTC | 192 | 740 | | 253 | 170 | 1360 |
| TC | 1265 | 119 | | 40.7 | 27.3 | 1450 |
| DC | 199 | 2300 | | 786 | 527 | 3810 |
| TYL | a | 3090 | | 1050 | 706 | 4850 |
| ETM-H2O | 1244 | 1580 | | 565 | 377 | 3770 |
| LIN | 999 | 4340 | | 1480 | 993 | 7820 |
| VAN | NF | NF | | NF | NF | NF |

a The antibiotic is a veterinary antibiotic, not for humans. NF: Not found

2. Measurement of water parameters

In detail, temperature, pH, dissolve oxygen (DO), ORP, electrical conductivity (EC) and turbidity were measured *in situ* using portable equipment (Hach, USA). In addition, all the above parameters were classified as basic indictors. Water samples filtered through 0.45μm membrane filters (Millipore, USA) were then analyzed for dissolved total organic carbon (DOC), dissolved total phosphorus (DTP) and dissolved total nitrogen (DTN) [2].

**Table S4.** HPLC-MS/MS parameters for analysis of the analytes by MRM.

| **Analytes** | **Precursor (m/z)** | **Product ion (m/z)** | **CE (eV)** |
| --- | --- | --- | --- |
| SDZ | 251.1 | 156 | 14 |
| SMM | 281 | 108 | 23 |
| SQX | 301 | 156 | 14 |
| NOR | 320.1 | 276.2 | 16 |
| CIP | 332.2 | 314.2 | 20 |
| OFC | 362.2 | 318 | 17 |
| AMX | 366.1 | 114.1 | 16 |
| CLX | 348.1 | 158 | 8 |
| PENG | 335 | 160 | 7 |
| PENV | 351.1 | 229.1 | 14 |
| OTC | 461.2 | 426 | 18 |
| TC | 444.8 | 427.3 | 10 |
| DC | 445.2 | 428.2 | 18 |
| TYL | 916.6 | 174 | 34 |
| ETM-H2O | 716.3 | 158 | 28 |
| LIN | 407.2 | 126.1 | 35 |
| VAN | 725.1 | 144.1 | 13 |
| CIP-D8 | 340.2 | 296.2 | 17 |
| NOR-D5 | 325.1 | 281.2 | 10 |

3. Quality assurance and quality control

Internal standard method was selected for quantification throughout with standard curves of 8-point ranging from 5 ng·mL-1 to 800 ng·mL-1 based on the surrogate standard. The coefficient (R2) of standard curve for all these antibiotics were over 0.99. Method quantification limit (MQL) of analytes were determined as the lowest observable concentration in spiked extracts of water and sediment samples giving a S/N ratio of 10. The method blank, spiked blanks and triplicate samples were used to conduct the recovery and precision of the process. The MQLs of antibiotics ranged 0.028-0.751 ng/L and 0.006-0.16 ng/gin water phase and sediment phase, respectively. Method recovery ratios for the antibiotics in the water phase (100 ng/L) ranged from 73 ± 4% to 102 ± 9%, and the method recovery ratios for the antibiotics in the sediment phase (100 ng/g) ranged from 69 ± 4% to 111 ± 26%. Additionally, more detail information on method detection limits and method recoveries of individual pesticides were shown in Table S4.

**Table S5.** Method quantification limit (MQL), and recoveries of the antibiotics.

| **Water phase** | | | **Sediment phase** | |
| --- | --- | --- | --- | --- |
| Compounds | MQL(ng/mL) | recovery (%) | MQL (ng/g) | recovery (%) |
| SDZ | 0.277 | 90 ± 15 | 0.064 | 78 ± 4 |
| SMM | 0.233 | 91 ± 12 | 0.058 | 76 ± 7 |
| SQX | 0.084 | 80 ± 16 | 0.02 | 78 ± 5 |
| NOR | 0.677 | 102 ± 14 | 0.14 | 99 ± 19 |
| CIP | 0.385 | 88 ± 14 | 0.079 | 91 ± 14 |
| OFC | 0.028 | 112 ± 9 | 0.006 | 78 ± 8 |
| AMX | 0.438 | 73 ± 4 | 0.098 | 69 ± 4 |
| CLX | 0.367 | 87 ± 10 | 0.105 | 82 ± 8 |
| PENG | 0.118 | 78 ± 11 | 0.025 | 70 ± 4 |
| PENV | 0.751 | 77 ± 8 | 0.16 | 93 ± 27 |
| OTC | 0.159 | 85 ± 7 | 0.026 | 83 ± 4 |
| TC | 0.188 | 91 ± 4 | 0.042 | 78 ± 7 |
| DC | 0.293 | 76 ± 4 | 0.051 | 102 ± 24 |
| TYL | 0.204 | 107 ± 12 | 0.043 | 95 ± 15 |
| ETM-H2O | 0.236 | 97 ± 13 | 0.052 | 111 ± 26 |
| LIN | 0.063 | 94 ± 11 | 0.013 | 72 ± 9 |
| VAN | 0.387 | 86 ± 5 | 0.09 | 79 ± 3 |
| CIP-D8 | 0.23 | 98 ± 15 | 0.034 | 88 ± 8 |





**Figure S2.** Antibiotic concentrations in the 39 water samples in the HRDR during the three seasons (July-2015, November-2015, and March-2016).





**Figure S3.** Spatiotemporal variations of antibiotic compositions in the 39 water samples of the HRDR during the three seasons (July-2015, November-2015, and March-2016).





**Figure S4.** Antibiotic concentrations and compositions in the 15 sediment samples of the FSBR with the three seasons.

**Table S6.** Ecotoxicity endpoints for fish, aquatic invertebrates, and algae and related PNEC values (μg/L) for these antibiotics.

|  | **Fish** | **Aquatic invertebrates** | **Algae** | **Critical concentration** | **Assessment factor** | **PNEC (μg/L)** | **References** |
| --- | --- | --- | --- | --- | --- | --- | --- |
| sulfadiazine | NFa | 100 | 10 | NOEC:10 | 50 | 0.2 | ECOSAR |
| sulfamonomethoxine | NF | 48000 (EC50) | 5900 (EC50) | EC50:5900 | 1000 | 5.9 | [3] |
| sulfaquinoxaline | NF | 781000 | 20000 | NOEC:20000 | 50 | 400 | [4] |
| norfloxacin | 2.7 | 120 | 1.6 | NOEC:1.6 | 10 | 0.16 | ECOSAR |
| ciprofloxacin | NF | 1000 (EC50) | 500 | NOEC:500 | 1000 | 0.5 | ECOSAR |
| ofloxacin | NF | 5000 | 500 | NOEC:500 | 100 | 5 | ECOSAR |
| amoxicillin | NF | 10 | 3.7 (EC50) | EC50:3.7 | 100 | 0.037 | ECOSAR |
| cefalexin | NF | NF | 2500 | NOEC:2500 | 1000 | 2.5 | [5] |
| penicillin G | NF | 1000000 (EC50) | 100000 | NOEC:100000 | 1000 | 100 | ECOSAR |
| penicillin V | NF | 1000000 (EC50) | 100000 | NOEC:10000 | 1000 | 100 | ECOSAR |
| oxytetracycline | 40000 | 100 | 3.1 | NOEC:3.1 | 10 | 0.31 | ECOSAR |
| tetracycline | 0.05 | 100 | 5.0 | NOEC:0.05 | 10 | 0.005 | ECOSAR |
| doxycycline | 90600 (EC50) | 681000 (EC50) | 316 (EC50) | EC50: 316 | 1000 | 0.316 | [6] |
| tylosin | NF | 45000 | 64 | NOEC:64 | 50 | 1.28 | ECOSAR |
| erythromycin-H2O | NF | 248 | 2.0 | NOEC:2 | 50 | 0.04 | ECOSAR |
| lincomycin | 4200 | 153000 | NF | NOEC:4200 | 50 | 84 | ECOSAR |
| vancomycin | NF | NF | 724000 (EC50) | EC50:724000 | 1000 | 724 | [7] |

**Table S7.** Minimal selective concentrations (MSCs) for the available antibiotic (in μg/L) [8].

| **SDZ** | **SMM** | **SQX** | **NOR** | **CIP** | **OFC** | **AMX** | **CLX** |
| --- | --- | --- | --- | --- | --- | --- | --- |
| NF | NF | NF | 0.5 | 0.064 | 0.5 | 0.25 | 4 |
| PENV | OTC | TC | DC | TYL | ETM-H2O | LIN | VAN |
| NF | 0.5 | 1 | 2 | 4 | 1 | 2 | 8 |

NF: Not found

References

1. Zhang, Q.Q.; Ying, G.G.; Pan, C.G.; Liu, Y.S.; Zhao, J.L. Comprehensive evaluation of antibiotics emission and fate in the river basins of China: Source analysis, multimedia modeling, and linkage to bacterial resistance. *Environ. Sci. Technol*. **2015**, *49*, 6772–6782.
2. Chen, Y.; Yu, K.; Zhou, Y.; Ren, L.; Kirumba, G.; Zhang, B.; He, Y. Characterizing spatiotemporal variations of chromophoric dissolved organic matter in headwater catchment of a key drinking water source in China. *Environ. Sci. Pollut. Res Int*. **2017**, *24*, 27799–27812.
3. Huang, D.J.; Hou, J.H.; Kuo, T.F.; Lai, H.T. Toxicity of the veterinary sulfonamide antibiotic sulfamonomethoxine to five aquatic organisms. *Environ. Toxicol. Pharmacol.* **2014**, *38*, 874–880.
4. De Liguoro, M.; Di Leva, V.; Gallina, G.; Faccio, E.; Pinto, G.; Pollio, A. Evaluation of the aquatic toxicity of two veterinary sulfonamides using five test organisms. Chemosphere **2010**, *81*, 788–793.
5. Lin, A.Y.; Yu, T.H.; Lin, C.F. Pharmaceutical contamination in residential, industrial, and agricultural waste streams: Risk to aqueous environments in Taiwan. Chemosphere **2008**, *74*, 131–141.
6. Deng, W.; Li, N.; Zheng, H.; Lin, H. Occurrence and risk assessment of antibiotics in river water in Hongkong. *Ecotoxicol. Environ. Saf.* **2016**, *125*, 121–127.
7. Magdaleno, A.; Saenz, M.E.; Juarez, A.B.; Moretton, J. Effects of six antibiotics and their binary mixtures on growth of pseudokirchneriella subcapitata. *Ecotoxicol. Environ. Saf.* **2015**, *113*, 721–78.
8. Bengtsson-Palme, J.; Larsson, D.G. Concentrations of antibiotics predicted to select for resistant bacteria: Proposed limits for environmental regulation. *Environ. Int.* **2016**, *86*, 1401–149.

© 2018 by the authors. Submitted for possible open access publication under the
terms and conditions of the Creative Commons Attribution (CC BY) license (http://creativecommons.org/licenses/by/4.0/).
